# Supplementary material for: Carbon dots from contaminated Eichhornia crassipes roots for spectrally multiplexed identification and sensing of solvents
Source: Royal Society of Chemistry journal article supplement (doi:10.1039/d6ra00409a), 2026-04-28
Supplement: d6ra00409a1.pdf [file d6ra00409a1.pdf]

## Supporting Information

### ***Carbon Dots from Contaminated Eichhornia Crassipes Roots for Spectrally Multiplexed Identification and Sensing of Solvents***

**M. Rangel<sup>1,2</sup>, S.D. Torres Landa<sup>1</sup>, I. E. Serrato-Mireles<sup>3</sup>, Y. Kumar<sup>1,4</sup>, N. Dasgupta Schubert<sup>3</sup>, J. E. García<sup>5</sup>, J. S. Pérez-Huerta<sup>2</sup>, V. Agarwal<sup>1\*</sup>**

<sup>1</sup> Centro de Investigación en Ingeniería y Ciencias Aplicadas, IICBA- UAEM, Av. Univ. 1001, Col. Chamilpa, Cuernavaca, Morelos, 62209, México

<sup>2</sup>Unidad Académica de Ciencia y Tecnología de la Luz y la Materia-UAZ, Circuito Marie Curie S/N, Parque de Ciencia y Tecnología QUANTUM Ciudad del conocimiento, 98160, Zacatecas, Zac., México

<sup>3</sup>Facultad de Ciencias fisicomatemáticas, Universidad Michoacana de San Nicolás de Hidalgo, Santiago Tapia 403, col. Centro, 58000 Morelia, Mich., México

<sup>4</sup>Facultad de Física y Matemáticas (FCFM), Universidad Autónoma de Nuevo León (UANL), Cd. Universitaria, San Nicolás de Los Garza, N.L., 66451, México

<sup>5</sup>Secihti -Cinvestav, Unidad Saltillo, Ave. Industria Metalúrgica 1062, Parque Industrial, Ramos Arizpe, 25900, Coahuila, México

\*Corresponding author e-mail: [vagarwal@uaem.mx](mailto:vagarwal@uaem.mx)

**Table S1.** Parameters of water from Jovita lagoon in “Naranja de Tapia”, Michoacán, México and *E. crassipes* roots.

| Parameter              | Polluted water    | <i>E. crassipes</i> roots |
|------------------------|-------------------|---------------------------|
| pH                     | 8.4 ± 0.15        | 7.14 ± 0.18               |
| Conductivity (mS)      | 533.3 ± 4.73      | 4.87 ± 0.18               |
| TDS (mg/l)             | 376.77 ± 1.07     | 3.39 ± 0.02               |
| Nitrogen (mg/l)        | -                 | 9 ± 0.6                   |
| Phosphorus (mg/l)      | 0.0952 ± 0.0091 * | 102.6 ± 1.2               |
| Nitrite (mg/l)         | 0.0037 ± 0.0001 * | -                         |
| Nitrate (mg/l)         | 0.0185 ± 0 *      | -                         |
| Orthophosphates (mg/l) | 0.0524 ± 0.0036 * | -                         |
| Ammonium (mg/l)        | 0.0103 ± 0.0003 * | -                         |
| Total hardness +       | 169 ± 1.4142 *    | -                         |
| Calcium hardness       | 73 ± 4.2426 *     | -                         |
| Alkalinity (mg/l)      | 300 ± 2 *         | -                         |

TDS (Total dissolved solids)

\*Determined according to APHA, AWWA & WEF test methods. Value parameters in accordance with NMX-001-SAGARPA-2021.

**Table S2.** Contaminants and micro/macro-nutrients detected by TXRF (Total reflection X-ray Fluorescence) in *E. crassipes* roots used as precursors for CDs and the Jovita lagoon water.

| <b>Macronutrients</b> | <b>Polluted water<br/>(mg/l)</b> | <b><i>E. crassipes</i> roots<br/>(mg/l)</b> |
|-----------------------|----------------------------------|---------------------------------------------|
| Potassium             | 0.53 ± 0.16                      | 116.09 ± 0.17                               |
| Calcium               | 13.25 ± 0.043                    | 12.75 ± 0.035                               |
| Sulphur               | 8.65 ± 0.11                      | 45.51 ± 0.16                                |
| Phosphorus            | 0.53 ± 0.16                      | 11.60 ± 0.15                                |
| <b>Micronutrients</b> |                                  |                                             |
| Iron                  | 0.087 ± 0.003                    | 0.127 ± 0.002                               |
| Zinc                  | 0.031 ± 0.002                    | 0.054 ± 0.001                               |
| Manganese             | 0.021 ± 0.004                    | 0.006 ± 0.003                               |
| Copper                | 0.016 ± 0.002                    | 0.064 ± 0.002                               |
| Chlorine              | 0.353 ± 0.051                    | 8.746 ± 0.0062                              |
| Nickel                | 0.006 ± 0.002                    | 0.022 ± 0.002                               |

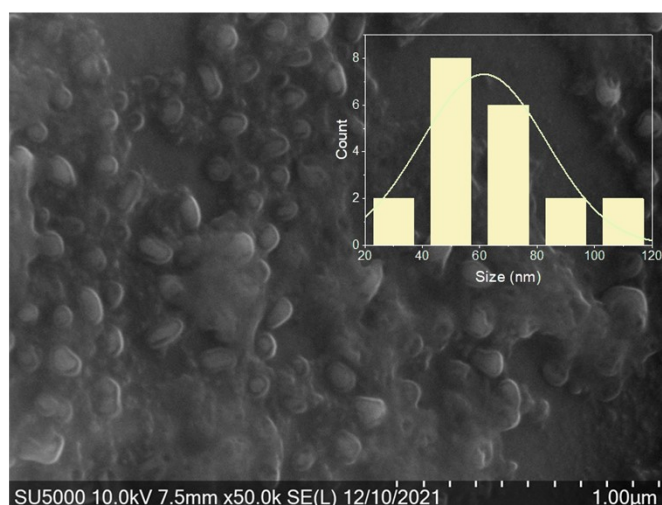

**Figure S1.** FESEM image of CDs-w dried on a silicon substrate and dried at 60°C.

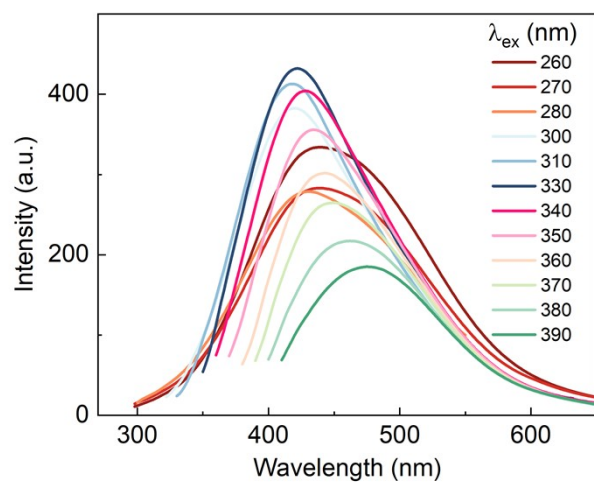

**Figure S2.** Effect of excitation wavelength on the emission spectra of CDs-w.

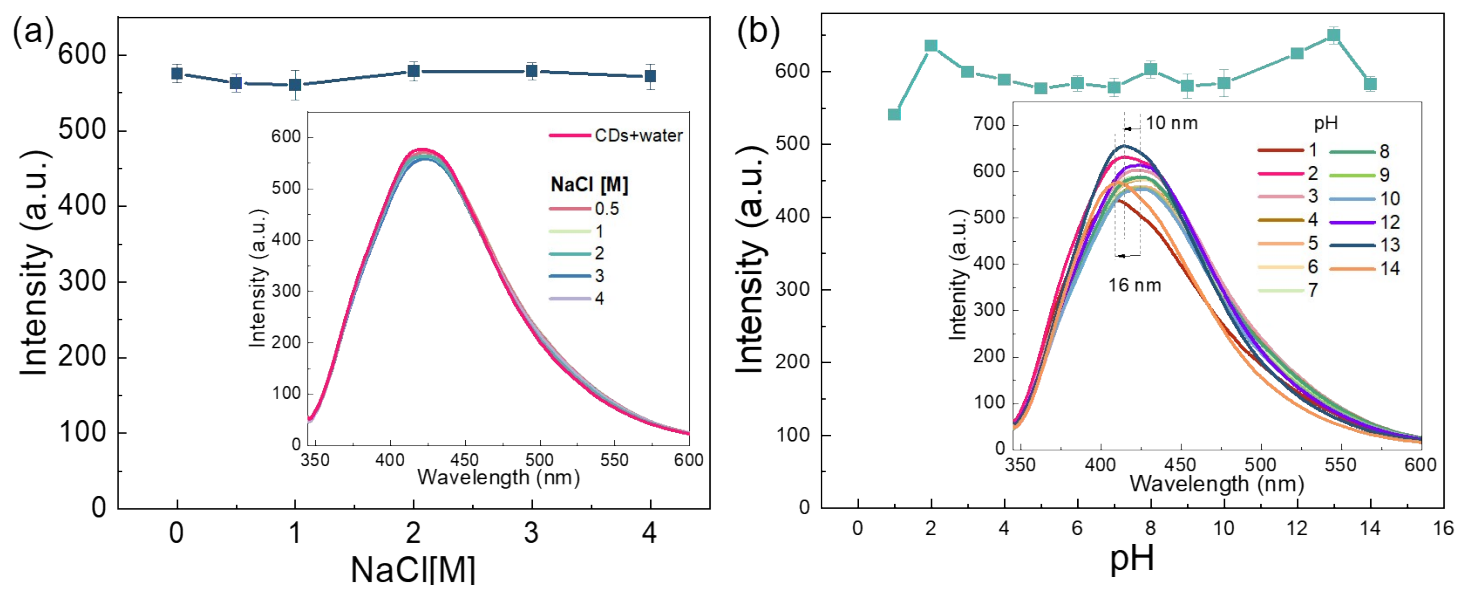

**Figure S3.** Influence of (a) NaCl concentration and (b) pH in the PL of CDs-w.
